## CORRECTION

# Correction: Generation and selection of pluripotent stem cells for robust differentiation to insulin-secreting cells capable of reversing diabetes in rodents

Sheryl M. Southard, Rama P. Kotipatruni, William L. Rust

There are a number of errors in [Fig 3](#), “Characterization of SR1423,” panels B-C. Please see the complete, correct [Fig 3](#) here.

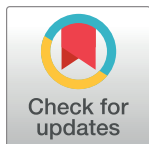

## OPEN ACCESS

**Citation:** Southard SM, Kotipatruni RP, Rust WL (2019) Correction: Generation and selection of pluripotent stem cells for robust differentiation to insulin-secreting cells capable of reversing diabetes in rodents. PLoS ONE 14(10): e0224944. <https://doi.org/10.1371/journal.pone.0224944>

**Published:** October 31, 2019

**Copyright:** © 2019 Southard et al. This is an open access article distributed under the terms of the [Creative Commons Attribution License](#), which permits unrestricted use, distribution, and reproduction in any medium, provided the original author and source are credited.

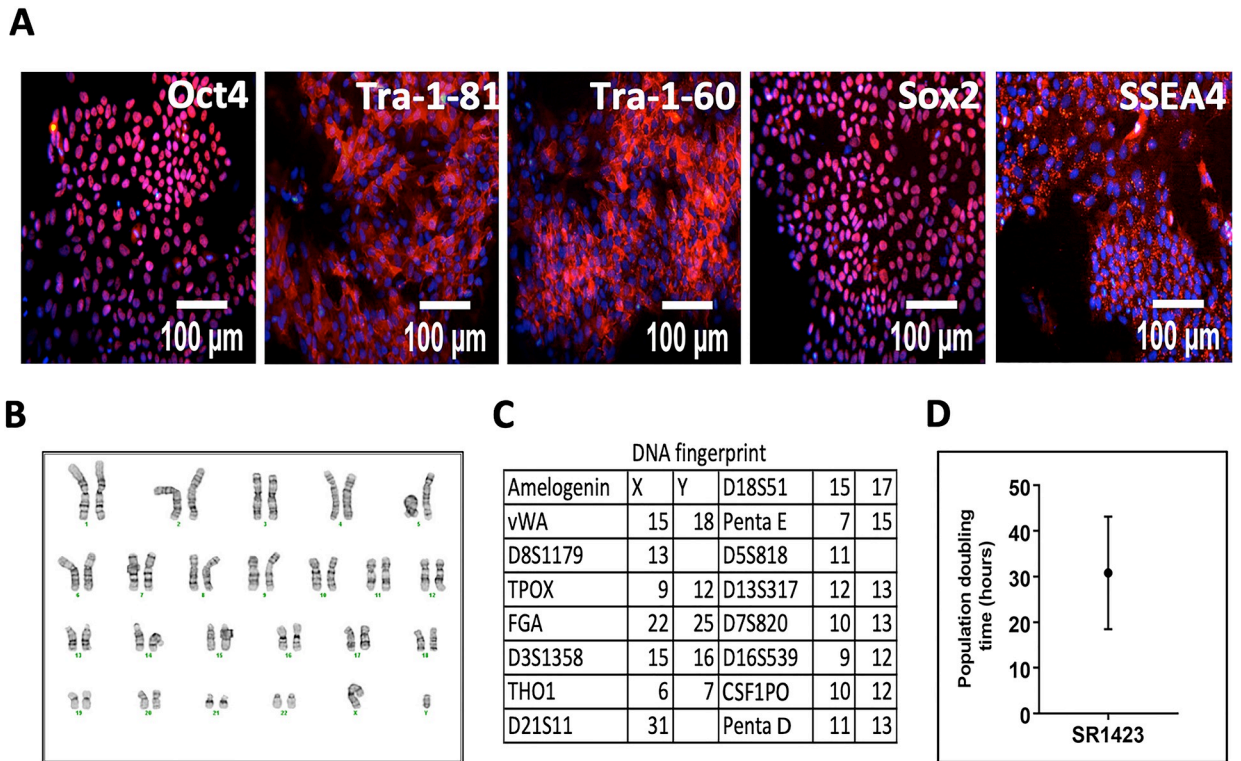

**Fig 3. Characterization of SR1423.** SR1423 cells have characteristics typical of pluripotent stem cells. (A) In the undifferentiated state, SR1423 expressed the markers of pluripotent stem cells Oct4, Tra-1-81, Tra-1-60, Sox2, and SSEA4. Images include nuclear stain (blue). (B) Cell karyotype after 40 passages in culture. Cells were karyotyped at passage 11 and passage 40 with identical results. (C) DNA fingerprint of SR1423 as assessed by single tandem repeat analysis (STR). (D) Column mean and error bar graph represents SR1423 cell doubling time. Scale bar 100 µm.

<https://doi.org/10.1371/journal.pone.0224944.g001>

## Reference

1. Southard SM, Kotipatruni RP, Rust WL (2018) Generation and selection of pluripotent stem cells for robust differentiation to insulin-secreting cells capable of reversing diabetes in rodents. *PLoS ONE* 13 (9): e0203126. <https://doi.org/10.1371/journal.pone.0203126> PMID: 30183752
